# Supplementary material for: Weed Responses to Crop Residues Management in a Summer Maize Cropland in the North China Plain
Source: MDPI journal article supplement (doi:10.3390/agriculture11080746), 2021-08-06
Supplement: s1 [file s1]

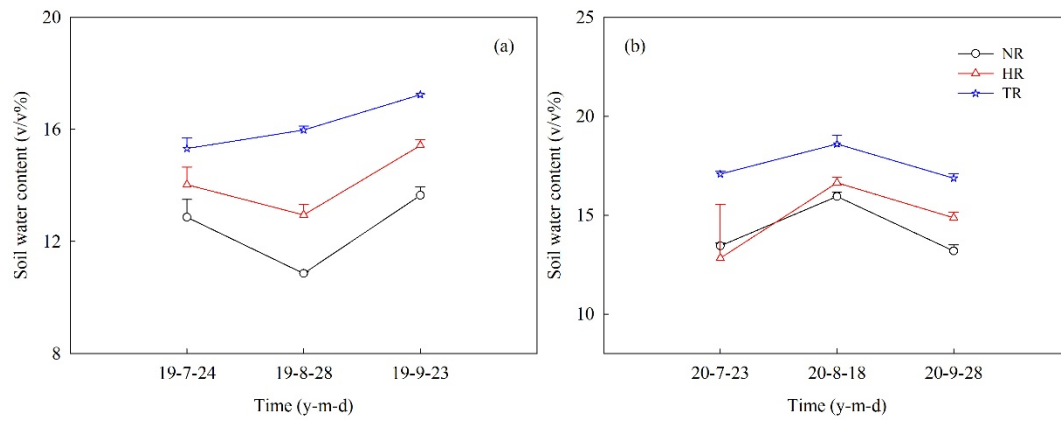

**Figure S2** Soil water content in 2019 (a) and 2020 (b) under treatments (NR: no crop residues retention; HR: half crop residues retention; TR: total crop residues retention) during the study period.
