# Supplementary material for: Weed Responses to Crop Residues Management in a Summer Maize Cropland in the North China Plain
Source: MDPI journal article supplement (doi:10.3390/agriculture11080746), 2021-08-06
Supplement: s1 [file s1]

**Table S5**

Significance of the impacts of crop residues retention, year, and their interactions on the weed community-level diversity during the period of study.

| Source of variation | Community-level diversity |          |                       |          |
|---------------------|---------------------------|----------|-----------------------|----------|
|                     | Species richness          |          | Pielou evenness index |          |
|                     | <i>F</i>                  | <i>p</i> | <i>F</i>              | <i>p</i> |
| Year                | 20.455                    | 0.001**  | 13.601                | 0.003**  |
| Residue             | 4.455                     | 0.036*   | 1.807                 | 0.206    |
| Year × Residue      | 1.909                     | 0.191    | 0.439                 | 0.655    |

The categorical factors are the year and crop residue.

Presented are the *F*-statistics, *p*-values with the level of significance; \**p* < 0.05, \*\**p* < 0.01, \*\*\**p* < 0.001.
