# Supplementary material for: Weed Responses to Crop Residues Management in a Summer Maize Cropland in the North China Plain
Source: MDPI journal article supplement (doi:10.3390/agriculture11080746), 2021-08-06
Supplement: s1 [file s1]

**Table S3**

Significance of the impacts of crop residues retention, year, and their interactions on aboveground dry matter of weeds during the period of study.

| Source of variation | Aboveground dry matter of weeds |            |                     |            |                   |          |
|---------------------|---------------------------------|------------|---------------------|------------|-------------------|----------|
|                     | Total weeds                     |            | Monocotyledon weeds |            | Dicotyledon weeds |          |
|                     | <i>F</i>                        | <i>p</i>   | <i>F</i>            | <i>p</i>   | <i>F</i>          | <i>p</i> |
| Year                | 1.029                           | 0.330      | 2.703               | 0.126      | 5.578             | 0.036*   |
| Residue             | 31.151                          | < 0.001*** | 25.410              | < 0.001*** | 2.004             | 0.177    |
| Year × Residue      | 2.445                           | 0.129      | 2.615               | 0.114      | 0.933             | 0.420    |

The categorical factors are the year and crop residue.

Presented are the *F*-statistics, *p*-values with the level of significance; \**p* < 0.05, \*\**p* < 0.01, \*\*\**p* < 0.001.
