# Supplementary material for: Weed Responses to Crop Residues Management in a Summer Maize Cropland in the North China Plain
Source: MDPI journal article supplement (doi:10.3390/agriculture11080746), 2021-08-06
Supplement: s1 [file s1]

**Table S2**

Significance of the impacts of crop residues retention, year, and their interactions on weed density during the period of study.

| Source of variation | Weed density |            |
|---------------------|--------------|------------|
|                     | <i>F</i>     | <i>p</i>   |
| Year                | 0.820        | 0.383      |
| Residue             | 82.680       | < 0.001*** |
| Year × Residue      | 2.002        | 0.178      |

The categorical factors are the year and crop residue.

Presented are the *F*-statistics, *p*-values with the level of significance;

\**p* < 0.05, \*\**p* < 0.01, \*\*\**p* < 0.001.
