# Supplementary material for: Weed Responses to Crop Residues Management in a Summer Maize Cropland in the North China Plain
Source: MDPI journal article supplement (doi:10.3390/agriculture11080746), 2021-08-06
Supplement: s1 [file s1]

**Table S1**

List of weed species and their classification on weed types under different crop residues management (NR: no crop residues retention, HR: half crop residues retention, TR: total crop residues retention) in the summer maize field in NCP during the study period.

| Weed species                                     |                | Functional groups |    | Weed occurrence |    |    |
|--------------------------------------------------|----------------|-------------------|----|-----------------|----|----|
| Latin binomial                                   | Family         | MT                | LC | NR              | HR | TR |
| 2019                                             |                |                   |    |                 |    |    |
| <i>Chloris virgata</i> Sw.                       | Poaceae        | M                 | A  |                 | √  |    |
| <i>Cirsium arvense</i> var. <i>integrifolium</i> | Asteraceae     | D                 | P  | √               |    |    |
| <i>Convolvulus arvensis</i>                      | Convolvulaceae | D                 | P  | √               | √  | √  |
| <i>Digitaria sanguinalis</i> (L.) Scop           | Poaceae        | M                 | A  |                 | √  | √  |
| <i>Eleusine indica</i> (L.) Gaertn               | Poaceae        | M                 | A  | √               |    |    |
| <i>Imperata cylindrica</i> (L.) Beauv.           | Poaceae        | M                 | P  | √               |    |    |
| <i>Rehmannia glutinosa</i>                       | Orobanchaceae  | D                 | P  |                 | √  |    |
| <i>Setaria viridis</i> (L.) Beauv                | Poaceae        | M                 | A  | √               | √  | √  |
| <i>Triticum aestivum</i> L.                      | Poaceae        | M                 | A  | √               | √  | √  |
| 2020                                             |                |                   |    |                 |    |    |
| <i>Abutilon theophrasti</i>                      | Malvaceae      | D                 | A  | √               |    | √  |
| <i>Cirsium arvense</i> var. <i>integrifolium</i> | Asteraceae     | D                 | P  | √               |    |    |
| <i>Convolvulus arvensis</i>                      | Convolvulaceae | D                 | P  | √               | √  | √  |
| <i>Digitaria sanguinalis</i> (L.) Scop           | Poaceae        | M                 | A  | √               | √  | √  |
| <i>Eleusine indica</i> (L.) Gaertn               | Poaceae        | M                 | A  |                 | √  |    |
| <i>Portulaca oleracea</i> L.                     | Portulacaceae  | D                 | A  | √               |    |    |
| <i>Triticum aestivum</i> L.                      | Poaceae        | M                 | A  |                 |    | √  |

MT, LC, D, M, A, P are morphological type, life cycle, dicotyledons, monocotyledons, annual, and perennial, respectively.

‘√’ means the occurrence of the weed under experimental treatments.
