# Supplementary material for: Weed Responses to Crop Residues Management in a Summer Maize Cropland in the North China Plain
Source: MDPI journal article supplement (doi:10.3390/agriculture11080746), 2021-08-06
Supplement: s1 [file s1]

**Table S4**

Significance of the impacts of crop residues retention, year, and their interactions on the relative abundance of weed types during the period of study.

| Source of variation | Weed types          |          |              |          |            |          |            |          |
|---------------------|---------------------|----------|--------------|----------|------------|----------|------------|----------|
|                     | Morphological types |          |              |          | Life cycle |          |            |          |
|                     | Monocotyledons      |          | Dicotyledons |          | Annuals    |          | Perennials |          |
|                     | <i>F</i>            | <i>p</i> | <i>F</i>     | <i>p</i> | <i>F</i>   | <i>p</i> | <i>F</i>   | <i>p</i> |
| Year                | 0.000               | 0.987    | 0.000        | 0.985    | 0.045      | 0.835    | 0.045      | 0.835    |
| Residue             | 2.341               | 0.139    | 2.347        | 0.138    | 2.955      | 0.090    | 2.955      | 0.090    |
| Year × Residue      | 0.634               | 0.547    | 0.635        | 0.547    | 0.446      | 0.651    | 0.446      | 0.651    |

The categorical factors are the year and crop residue.

Presented are the *F*-statistics, *p*-values with the level of significance; \**p* < 0.05, \*\**p* < 0.01, \*\*\**p* < 0.001.
