# Supplementary material for: Weed Responses to Crop Residues Management in a Summer Maize Cropland in the North China Plain
Source: MDPI journal article supplement (doi:10.3390/agriculture11080746), 2021-08-06
Supplement: s1 [file s1]

**Table S6**

Significance of the impacts of crop residues retention, year, and their interactions on the plant height and grain yield of maize during the period of study.

| Source of variation | Maize height and grain yield |            |             |            |
|---------------------|------------------------------|------------|-------------|------------|
|                     | Plant height                 |            | Grain yield |            |
|                     | <i>F</i>                     | <i>p</i>   | <i>F</i>    | <i>p</i>   |
| Year                | 510.165                      | < 0.001*** | 729.141     | < 0.001*** |
| Residue             | 290.147                      | < 0.001*** | 8.186       | < 0.01**   |
| Year × Residue      | 11.544                       | < 0.01**   | 0.066       | 0.936      |

The categorical factors are the year and crop residue.

Presented are the *F*-statistics, *p*-values with the level of significance; \**p* < 0.05, \*\**p* < 0.01, \*\*\**p* < 0.001.
